# Supplementary material
Source: PubMed Central journal article supplement (PMC7219472)

## SUPPLEMENTARY FIGURES

### Supplementary Figure 1:

- A. Truncating mutations and copy number alterations of *MGA* and *MYC* in lung adenocarcinomas.
- B. Loss-of-function alterations (truncating mutations and copy number deletions) of *MGA* in diverse cancer types in the TCGA Pan-Cancer Analysis. UCEC: uterine corpus endometrial carcinoma, LUAD: lung adenocarcinoma, CRC: colorectal carcinoma, STAD: stomach adenocarcinoma, SKCM: skin cutaneous melanoma, BLCA: bladder carcinoma, KIRC: kidney renal clear cell carcinoma, PRAD: prostate adenocarcinoma, LUSC: lung squamous cell carcinoma, LIHC: liver hepatocellular carcinoma, KIRP: kidney renal papillary cell carcinoma, CESC: cervical squamous cell carcinoma, HNSC: head and neck squamous cell carcinoma, BRCA: breast adenocarcinoma, LGG: brain lower grade glioma.

### Supplementary Figure 2:

- A. David pathway analysis for proteins enriched by MGA immunoprecipitation.
- B. Members of the PCGF6-PRC1 complex captured in the IP-Mass Spec assay.

### Supplementary Figure 3:

- A. Immunoprecipitation (IP) of MGA and IgG, followed by immunoblotting of MGA and HDAC4 in NCI-H23 cells.
- B. Immunoprecipitation (IP) of E2F6, IgG and RNF2, followed by immunoblotting of MGA, E2F6 and RNF2 in NCI-H23 cells.

**Supplementary Figure 4:** Homer de novo motif analysis results for MGA binding sites identified from MGA ChIP-seq in A549 cells.

### Supplementary Figure 5:

- A. Pearson correlation between the ChIP-seq signal of MGA, MYC, MAX and E2F6 from A549 cells across MGA binding sites. The correlation  $r$  values are indicated.
- B. ChIP-qPCR of MYC and MGA in NCI-H23 cells at promoter regions of MYC-target genes *AURKA* and *CDK4*. Genomic regions that are not bound by MYC and MGA serve as negative controls (NC1 and NC2).

**Supplementary Figure 6:** ChIP-seq signal of MGA at the *AURKA* and *NME1* (MYC target genes) loci in A549 cells with and without MGA overexpression. Positions of E-box DNA motif (CACGTG) or its variant (CACNTG) are indicated.

**Supplementary Figure 7:**

- A.** Gene Set Enrichment Analysis (GSEA) analysis of RNA-seq results in A549 cells showed that MGA-repressed genes (blue) and MYC-activated genes (red) are enriched in the same GSEA Hallmark gene sets.
- B.** Percentage of MGA-repressed/MYC-activated genes that are bound by MGA and E2F6 at their promoter regions.

**Supplementary Figure 8:**

- A.** Immunoblots showing the overexpression of *MGA* in the *MGA*-mutant LXF289 cells.
- B.** MGA overexpression decreases the proliferation of LXF289 cells. The percentage of GFP-positive cells was counted four and six days post seeding the cells and normalized to the empty-ZsGreen control (n=2).
- C.** MGA overexpression reduces expression of MYC-target genes *CDK4*, *AURKA* and *NME1* in LXF289 cells (n=2).

**Supplementary Figure 9**

- A.** Apoptosis assay using Annexin/PI staining (n=2).
- B.** Cell cycle assay using PI staining (n=2). P values are derived from *t* tests, error bars: s.d. NS: not significant; \*P<0.05;

Figure S1

A

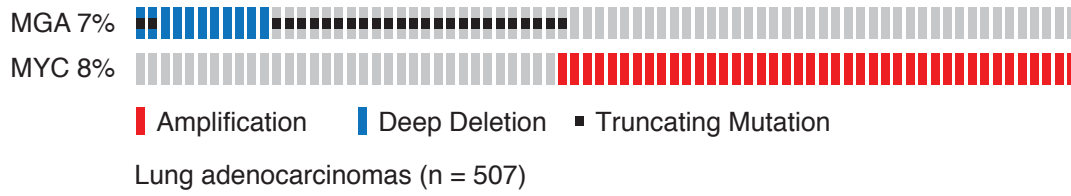

B

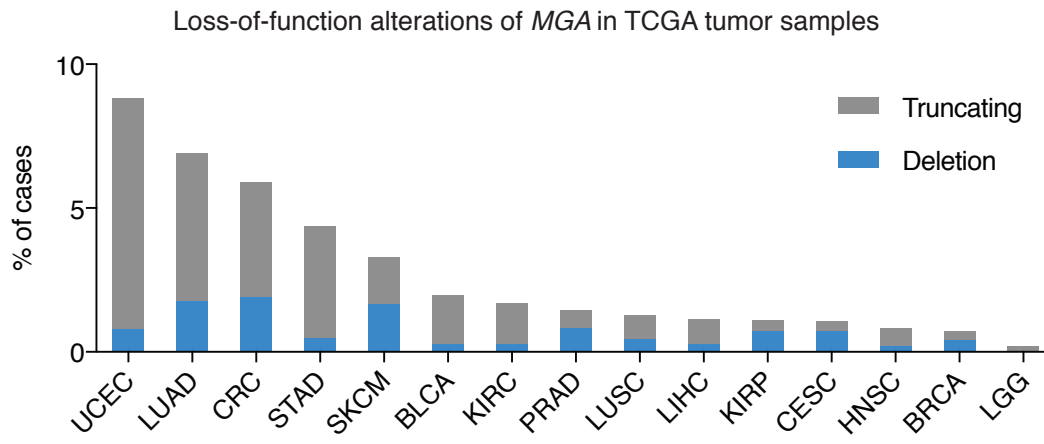

**Figure S2**

**A**

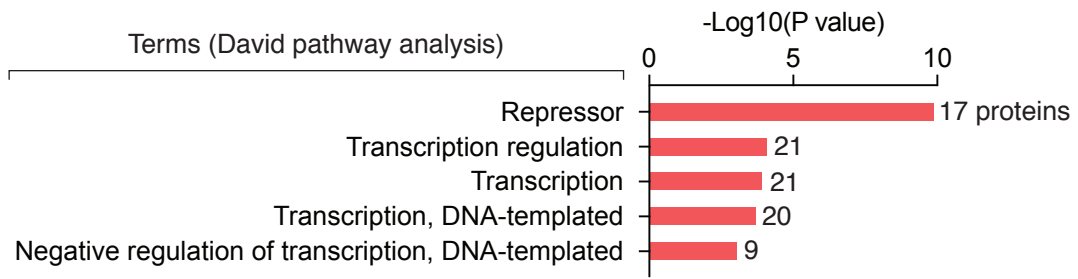

**B**

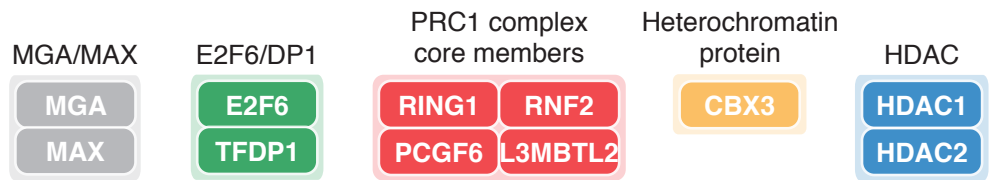

**Figure S3**

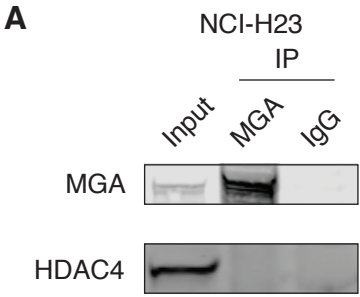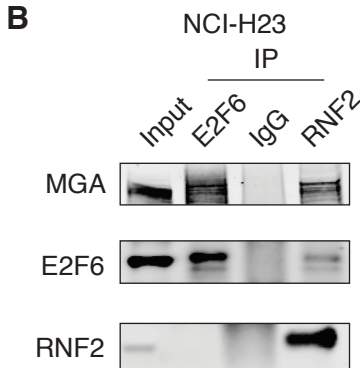

Figure S4

|                                                                                     | Rank | P-value   | log P-value | % of Targets | % of Background | Best Match/Details                                                  |
|-------------------------------------------------------------------------------------|------|-----------|-------------|--------------|-----------------|---------------------------------------------------------------------|
|    | 1    | 1e-650    | -1.50E+03   | 38.40%       | 14.87%          | n-Myc(bHLH)/mES-nMyc-ChIP-Seq(GSE11431)/Homer(0.971)                |
|    | 2    | 1e-458    | -1.06E+03   | 2.06%        | 0.00%           | STAT5(Stat)/mCD4+-Stat5-ChIP-Seq(GSE12346)/Homer(0.796)             |
|    | 3    | 1e-446    | -1.03E+03   | 2.63%        | 0.02%           | MYBL2/MA0777.1/Jaspar(0.532)                                        |
|    | 4    | 1e-428    | -9.88E+02   | 2.17%        | 0.01%           | PB0060.1_Smad3_1/Jaspar(0.662)                                      |
|    | 5    | 1e-400    | -9.22E+02   | 2.04%        | 0.01%           | CHR(?)/Hela-CellCycle-Expression/Homer(0.724)                       |
|    | 6    | 1e-337    | -7.77E+02   | 2.61%        | 0.04%           | PB0126.1_Gata5_2/Jaspar(0.659)                                      |
|    | 7    | 1.00E-296 | -6.83E+02   | 1.71%        | 0.01%           | PB0098.1_Zfp410_1/Jaspar(0.694)                                     |
|    | 8    | 1.00E-286 | -6.60E+02   | 2.18%        | 0.03%           | HSF2/MA0770.1/Jaspar(0.625)                                         |
|    | 9    | 1.00E-278 | -6.41E+02   | 2.03%        | 0.03%           | GATA3(Zf),DR4/iTreg-Gata3-ChIP-Seq(GSE20898)/Homer(0.690)           |
|    | 10   | 1.00E-273 | -6.30E+02   | 2.10%        | 0.03%           | ZNF415(Zf)/HEK293-ZNF415.GFP-ChIP-Seq(GSE58341)/Homer(0.661)        |
|    | 11   | 1.00E-260 | -6.01E+02   | 2.34%        | 0.05%           | SOX10/MA0442.1/Jaspar(0.667)                                        |
|    | 12   | 1.00E-249 | -5.74E+02   | 1.23%        | 0.00%           | STAT6(Stat)/CD4-Stat6-ChIP-Seq(GSE22104)/Homer(0.716)               |
|    | 13   | 1.00E-219 | -5.05E+02   | 1.65%        | 0.02%           | ZFX(Zf)/mES-Zfx-ChIP-Seq(GSE11431)/Homer(0.733)                     |
|    | 14   | 1.00E-157 | -3.63E+02   | 4.96%        | 1.03%           | AP-1(bZIP)/ThioMac-PU.1-ChIP-Seq(GSE21512)/Homer(0.975)             |
|   | 15   | 1.00E-146 | -3.37E+02   | 1.03%        | 0.01%           | Oct2(POU,Homeobox)/Bcell-Oct2-ChIP-Seq(GSE21512)/Homer(0.638)       |
|  | 16   | 1.00E-118 | -2.73E+02   | 50.05%       | 38.04%          | ZNF711(Zf)/SHSY5Y-ZNF711-ChIP-Seq(GSE20673)/Homer(0.805)            |
|  | 17   | 1.00E-113 | -2.61E+02   | 20.25%       | 11.88%          | Elk1(ETS)/Hela-Elk1-ChIP-Seq(GSE31477)/Homer(0.872)                 |
|  | 18   | 1.00E-105 | -2.42E+02   | 18.65%       | 10.88%          | NRF(NRF)/Promoter/Homer(0.760)                                      |
|  | 19   | 1.00E-95  | -2.19E+02   | 0.99%        | 0.04%           | TFCP2/MA0145.3/Jaspar(0.743)                                        |
|  | 20   | 1.00E-70  | -1.63E+02   | 8.69%        | 4.36%           | BORIS(Zf)/K562-CTCF-ChIP-Seq(GSE32465)/Homer(0.868)                 |
|  | 21   | 1.00E-67  | -1.56E+02   | 41.33%       | 32.57%          | PB0009.1_E2F3_1/Jaspar(0.652)                                       |
|  | 22   | 1.00E-57  | -1.32E+02   | 2.07%        | 0.49%           | PB0146.1_Mafk_2/Jaspar(0.728)                                       |
|  | 23   | 1.00E-57  | -1.32E+02   | 0.36%        | 0.00%           | Pax7(Paired,Homeobox)/Myoblast-Pax7-ChIP-Seq(GSE25064)/Homer(0.591) |
|  | 24   | 1.00E-46  | -1.07E+02   | 0.48%        | 0.02%           | PH0016.1_Cux1_1/Jaspar(0.608)                                       |
|  | 25   | 1.00E-46  | -1.06E+02   | 0.80%        | 0.08%           | PH0037.1_Hdx/Jaspar(0.741)                                          |
|  | 26   | 1.00E-18  | -4.28E+01   | 0.18%        | 0.01%           | Gfi1b(Zf)/HPC7-Gfi1b-ChIP-Seq(GSE22178)/Homer(0.641)                |
|  | 27   | 1.00E-17  | -3.93E+01   | 0.17%        | 0.01%           | PB0046.1_Mybl1_1/Jaspar(0.585)                                      |
|  | 28   | 1.00E+00  | -3.24E-02   | 0.15%        | 0.24%           | PB0097.1_Zfp281_1/Jaspar(0.899)                                     |

**Figure S5**

**A**

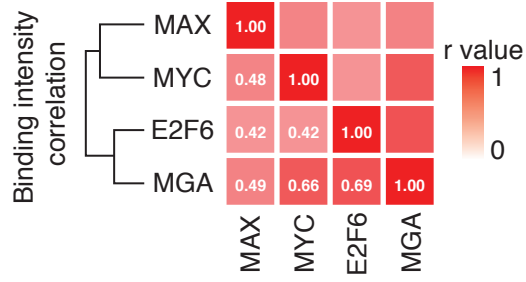

**B**

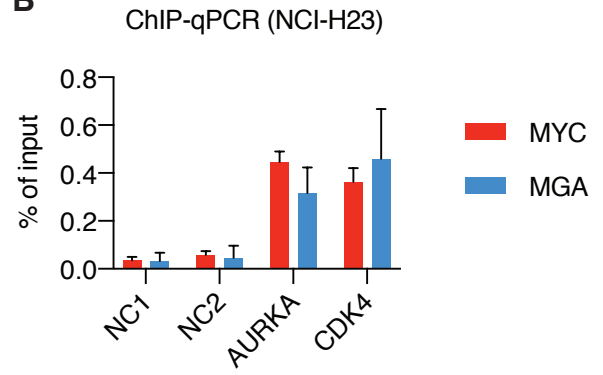

**Figure S6**

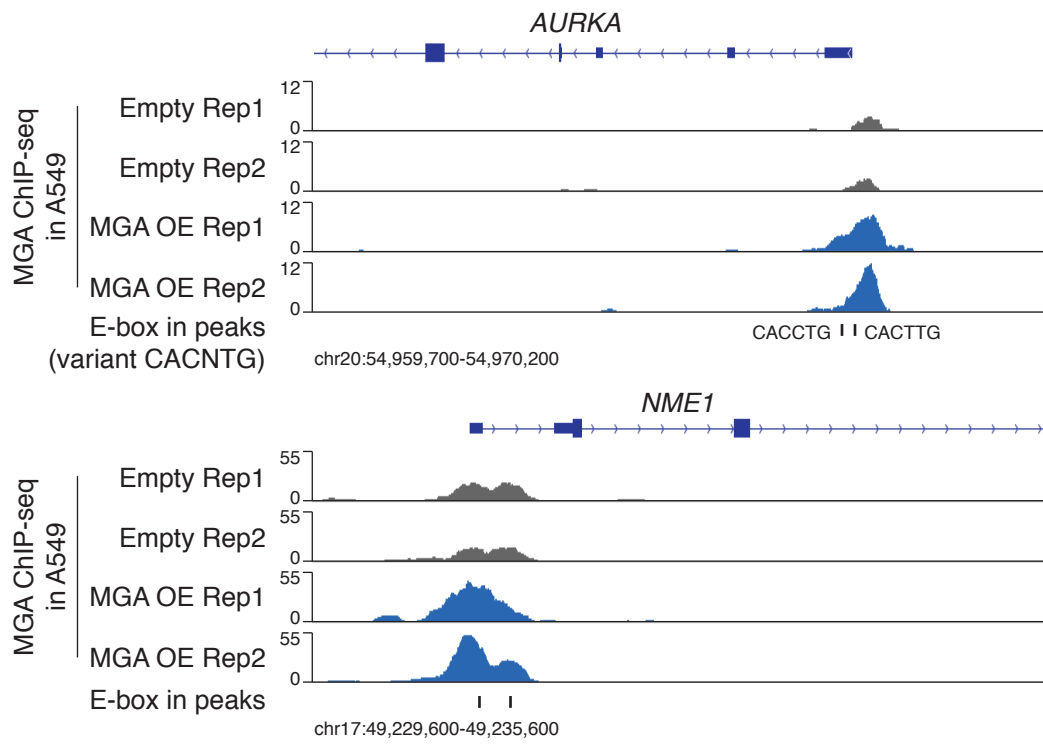



**Figure S7**

**A**

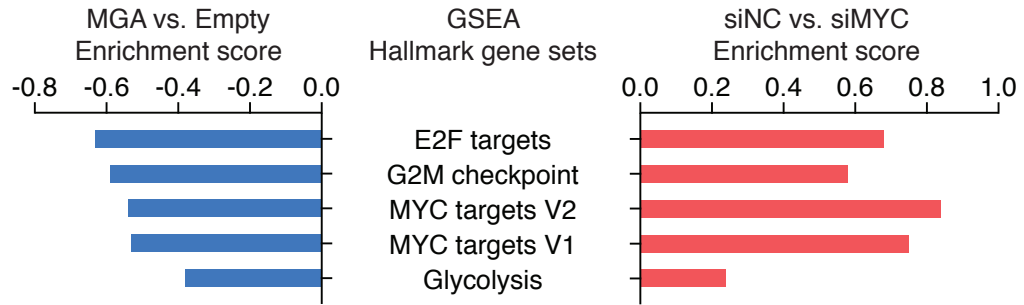

**B**

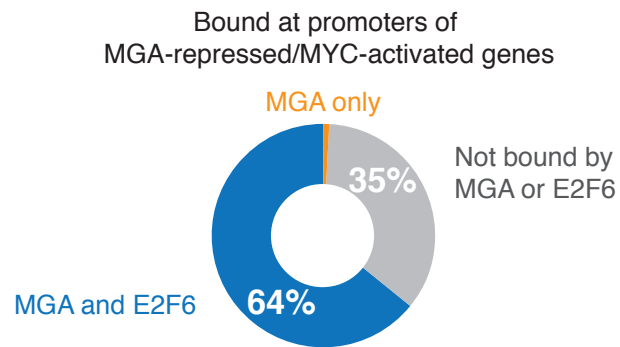

**Figure S8**

**A**

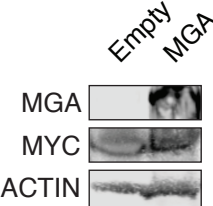

**B**

Competitive cell proliferation assay (LXF289)

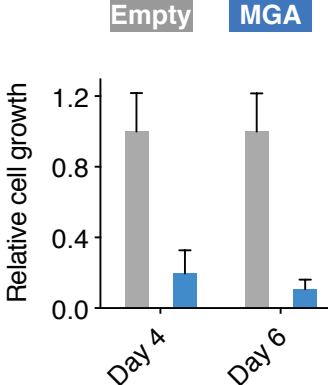

**C**

RT-qPCR for MYC-target genes (LXF289)

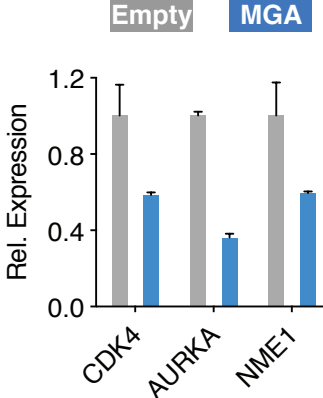

**Figure S9**

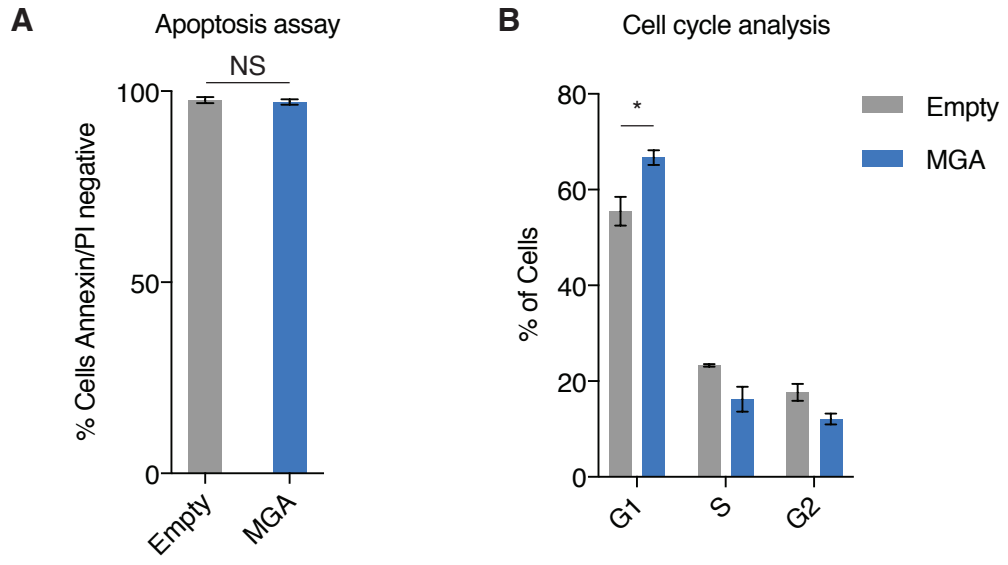

Supplement: NIHMS1547501-supplement-1.pdf [file NIHMS1547501-supplement-1.pdf]
